# Supplementary material
Source: MDPI journal article supplement (https://www.mdpi.com/2037-0164/14/1/14)
Supplement: s1 [file s1]

| Gene name                    | SolGenomics Glocus ID | Reference | Other names used (if any)                                  |
|------------------------------|-----------------------|-----------|------------------------------------------------------------|
| <b>PYLs</b>                  |                       |           |                                                            |
| <i>SIPYL1</i>                | <i>solyc06g061180</i> | [1]       | <i>SIRCAR2</i> in [2]<br><i>SIPYL8</i> in [3] and in [4]   |
| <i>SIPYL2</i>                | <i>solyc08g076960</i> | [1]       | <i>SIRCAR1</i> in [2]<br><i>SIPYL5</i> in [3] and in [4]   |
| <i>SIPYL3</i>                | <i>solyc12g095970</i> | [1]       | <i>SIRCAR3</i> in [2]<br><i>SIPYL14</i> in [3] and in [4]  |
| <i>SIPYL4</i>                | <i>solyc08g065410</i> | [1]       | <i>SIRCAR4</i> in [2]<br><i>SIPYL12</i> in [3] and in [4]  |
| <i>SIPYL5</i>                | <i>solyc03g095780</i> | [1]       | <i>SIRCAR6</i> in [2]<br><i>SIPYL4</i> in [3] and in [4]   |
| <i>SIPYL6</i>                | <i>solyc06g050500</i> | [1]       | <i>SIRCAR10</i> in [2]                                     |
| <i>SIPYL7</i>                | <i>solyc05g052420</i> | [1]       | <i>SIRCAR15</i> in [2]                                     |
| <i>SIPYL8</i>                | <i>solyc10g085310</i> | [1]       | <i>SIRCAR5</i> in [2]<br><i>SIPYL7</i> in [3] and in [4]   |
| <i>SIPYL9</i>                | <i>solyc09g015380</i> | [1]       | <i>SIRCAR8</i> in [2]                                      |
| <i>SIPYL10</i>               | <i>solyc10g076410</i> | [1]       | <i>SIRCAR7</i> in [2]<br><i>SIPYL11</i> in [3] and in [4]  |
| <i>SIPYL11</i>               | <i>solyc01g095700</i> | [1]       | <i>SIRCAR9</i> in [2]<br><i>SIPYL3</i> in [3] and in [4]   |
| <i>SIPYL12</i>               | <i>solyc03g007310</i> | [1]       | <i>SIRCAR12</i> in [2]<br><i>SIPYL10</i> in [3] and in [4] |
| <i>SIPYL13</i>               | <i>solyc08g082180</i> | [1]       | <i>SIRCAR13</i> in [2]<br><i>SIPYL1</i> in [3] and in [4]  |
| <i>SIPYL14</i>               | <i>solyc12g055990</i> | [1]       | <i>SIRCAR11</i> in [2]<br><i>SIPYL2</i> in [3] and in [4]  |
| <i>SIPYL15</i>               | <i>solyc02g076770</i> | [1]       | <i>SIRCAR14</i> in [2]<br><i>SIPYL13</i> in [3] and in [4] |
| <b>PP2Cs</b>                 |                       |           |                                                            |
| <i>SIPP2C28</i>              | <i>solyc03g096670</i> | [5]       | <i>SIPP2C1</i> in [4]                                      |
| <i>SIPP2C30</i>              | <i>solyc03g121880</i> | [5]       | <i>SIPP2C5</i> in [4]                                      |
| <i>SIPP2C39</i>              | <i>solyc05g052980</i> | [5]       | <i>SIPP2C2</i> in [4]                                      |
| <i>SIPP2C49</i>              | <i>solyc06g076400</i> | [5]       | <i>SIPP2C3</i> in [4] and                                  |
| <i>SIPP2C55</i>              | <i>solyc07g040990</i> | [5]       | <i>SIPP2C4</i> in [4] [6]                                  |
| <b>SnRK2s</b>                |                       |           |                                                            |
| <i>SlSnRk2.1</i>             | <i>solyc05g056550</i> | [4]       | -                                                          |
| <i>SlSnRk2.2</i>             | <i>solyc01g103940</i> | [4]       | -                                                          |
| <i>SlSnRk2.3/SIOST1</i>      | <i>solyc01g108280</i> | [4,7]     | -                                                          |
| <i>SlSnRk2.4</i>             | <i>solyc02g090390</i> | [4]       | -                                                          |
| <i>SlSnRk2.5</i>             | <i>solyc11g010130</i> | [4]       | -                                                          |
| <i>SlSnRk2.6</i>             | <i>solyc08g077780</i> | [4]       | -                                                          |
| <i>SlSnRk2.7</i>             | <i>solyc04g074500</i> | [4]       | -                                                          |
| <i>SlSnRk2.8</i>             | <i>solyc04g012160</i> | [4]       | -                                                          |
| <b>Transcription Factors</b> |                       |           |                                                            |
| <i>SlAREB1</i>               | <i>solyc04g078840</i> | [8,9]     | <i>SlbZIP33</i> in [10]<br><i>SlAREB</i> in [11]           |
| <i>SlAREB2</i>               | <i>solyc11g044560</i> | [8,9]     | <i>SlbZIP65</i> in [10]                                    |
| <i>SlNAC6</i>                | <i>solyc10g055760</i> | [12]      | -                                                          |
| <i>SlGRAS4</i>               | <i>solyc01g100200</i> | [9]       | -                                                          |
| <i>SlMYB50</i>               | <i>solyc06g071690</i> | [13]      | -                                                          |
| <i>SlMYB55</i>               | <i>solyc10g044680</i> | [14]      | -                                                          |

|                 |                       |      |   |
|-----------------|-----------------------|------|---|
| <i>SIHB2</i>    | <i>solyc05g006980</i> | [15] | - |
| <i>SibHLH96</i> | <i>solyc11g056650</i> | [16] | - |

**Table S1.** ABA signalling genes names used in this paper. For each gene is provided, the locus ID according to solgenomics ([www.solgenomics.net](http://www.solgenomics.net)), a reference and other name used in other papers.

## References

1. Li, J.; Hettenhausen, C.; Sun, G.; Zhuang, H.; Li, J. H.; Wu, J. The Parasitic Plant *Cuscuta australis* Is Highly Insensitive to Absciscic Acid-Induced Suppression of Hypocotyl Elongation and Seed Germination. *PLoS One* **2015**, *10*, e0135197.
2. Zou, J.; Li, N.; Hu, N.; Tang, N.; Cao, H.; Liu, Y.; Chen, J.; Jian, W.; Gao, Y.; Yang, J.; et al. Co-silencing of ABA receptors (SIRCAR) reveals interactions between ABA and ethylene signaling during tomato fruit ripening. *Hortic Res* **2022**, *9*.
3. Kai, W.; Wang, J.; Liang, B.; Fu, Y.; Zheng, Y.; Zhang, W.; Li, Q.; Leng, P. PYL9 is involved in the regulation of ABA signaling during tomato fruit ripening. *J Exp Bot* **2019**, *70*, 6305–6319.
4. Wang, J.; Xu, Y.; Zhang, W.; Zheng, Y.; Yuan, B.; Li, Q.; Leng, P. Tomato SIPP2C5 Is Involved in the Regulation of Fruit Development and Ripening. *Plant Cell Physiol* **2021**, *62*, 1760–1769.
5. Qiu, J.; Ni, L.; Xia, X.; Chen, S.; Zhang, Y.; Lang, M.; Li, M.; Liu, B.; Pan, Y.; Li, J.; et al. Genome-Wide Analysis of the Protein Phosphatase 2C Genes in Tomato. *Genes (Basel)* **2022**, *13*, 604.
6. Liang, B.; Sun, Y.; Wang, J.; Zheng, Y.; Zhang, W.; Xu, Y.; Li, Q.; Leng, P. Tomato protein phosphatase 2C influences the onset of fruit ripening and fruit glossiness. *J Exp Bot* **2021**, *72*, 2403–2418.
7. Chong, L.; Xu, R.; Huang, P.; Guo, P.; Zhu, M.; Du, H.; Sun, X.; Ku, L.; Zhu, J. K.; Zhu, Y. The tomato OST1–VOZ1 module regulates drought-mediated flowering. *Plant Cell* **2022**, *34*, 2001–2018.
8. Orellana, S.; Yañez, M.; Espinoza, A.; Verdugo, I.; González, E.; Ruiz-Lara, S.; Casaretto, J. A. The transcription factor SIAREB1 confers drought, salt stress tolerance and regulates biotic and abiotic stress-related genes in tomato. *Plant Cell Environ* **2010**, *33*, 2191–2208.
9. Liu, Y.; Wen, L.; Shi, Y.; Su, D.; Lu, W.; Cheng, Y.; Li, Z. Stress-responsive tomato gene SIGRAS4 function in drought stress and abscisic acid signaling. *Plant Science* **2021**, *304*, 110804.
10. Li, D.; Fu, F.; Zhang, H.; Song, F. Genome-wide systematic characterization of the bZIP transcriptional factor family in tomato (*Solanum lycopersicum* L.). *BMC Genomics* **2015**, *16*, 1–18.
11. Hsieh, T. H.; Li, C. W.; Su, R. C.; Cheng, C. P.; Sanjaya; Tsai, Y. C.; Chan, M. T. A tomato bZIP transcription factor, SIAREB, is involved in water deficit and salt stress response. *Planta* **2010**, *231*, 1459–1473.
12. Jian, W.; Zheng, Y.; Yu, T.; Cao, H.; Chen, Y.; Cui, Q.; Xu, C.; Li, Z. SINAC6, A NAC transcription factor, is involved in drought stress response and reproductive process in tomato. *J Plant Physiol* **2021**, *264*, 153483.
13. Chen, Y.; Feng, P.; Zhang, X.; Xie, Q.; Chen, G.; Zhou, S.; Hu, Z. Silencing of SIMYB50 affects tolerance to drought and salt stress in tomato. *Plant Physiology and Biochemistry* **2022**, *193*, 139–152.
14. Chen, Y.; Li, L.; Tang, B.; Wu, T.; Chen, G.; Xie, Q.; Hu, Z. Silencing of SIMYB55 affects plant flowering and enhances tolerance to drought and salt stress in tomato. *Plant Science* **2022**, *316*, 111166.
15. Hu, J.; Chen, G.; Yin, W.; Cui, B.; Yu, X.; Lu, Y.; Hu, Z. Silencing of SIHB2 Improves Drought, Salt Stress Tolerance, and Induces Stress-Related Gene Expression in Tomato. *J Plant Growth Regul* **2017**, *36*, 578–589.
16. Liang, Y.; Ma, F.; Li, B.; Guo, C.; Hu, T.; Zhang, M.; Liang, Y.; Zhu, J.; Zhan, X. A bHLH transcription factor, SibHLH96, promotes drought tolerance in tomato. *Hortic Res* **2022**, *9*.
